# Supplementary material for: Circular RNA as Therapeutic Targets in Atherosclerosis: Are We Running in Circles?
Source: MDPI journal article supplement (doi:10.3390/jcm12134446), 2023-07-02
Supplement: s1 [file s1]

**Table S1. A summary of the mechanisms of the 140 studies investigating the role of circular RNA in the pathogenesis of atherosclerosis from the years 2016-2022 as identified in PubMed**

| Circular RNA                     | Cell type                                                | Model                                   | Disease/<br>Intervention                 | Expression<br>alteration | Associated<br>microRNA                                 | Targeted<br>Gene/Protein  | Effect of overexpression                                                                                                                  |
|----------------------------------|----------------------------------------------------------|-----------------------------------------|------------------------------------------|--------------------------|--------------------------------------------------------|---------------------------|-------------------------------------------------------------------------------------------------------------------------------------------|
| circANRIL<br>[Holdt 2016]        | EC, SMC,<br>and adventitial<br>fibroblasts               | Human, in<br>vitro                      | N/A                                      | ↑                        | independent of<br>CDKN2A/B<br>and miRNA<br>sponging    | Directly binds to<br>PES1 | impaired ribosome<br>biogenesis, leading to activation of p53<br>and a subsequent decrease in<br>proliferation, and increase in apoptosis |
| circWDR77<br>[Chen J 2017]       | Vascular<br>SMCs,                                        | Human, in<br>vitro                      | High-glucose                             | ↑                        | miR-124                                                | FGF-2                     | Increased proliferation and migration                                                                                                     |
| hsa_circ_0003575<br>[Li CY 2017] | Vascular<br>ECs                                          | Human, in<br>vitro                      | Ox-LDL                                   | ↑                        | miR-199-3p,<br>miR-9-5p,<br>miR377-3p or<br>miR-141-3p | -                         | decreased proliferation and<br>angiogenesis                                                                                               |
| circANRIL<br>[Song CL 2017]      | Vascular<br>ECs                                          | Rat, in vivo                            | high-fat<br>diet/High-dose<br>Vitamin D3 | ↑                        | N/A                                                    | -                         | increased vascular EC apoptosis and<br>inflammatory factor expression                                                                     |
| circACTA2<br>[Sun Y 2017]        | Aortic<br>SMCs                                           | Humans,<br>Mouse, Rat<br>In vitro       | TGF-β                                    | ↑                        | miR-548f-5p                                            | NRG-1-ICD, α-<br>SMA,     | Increased stress fiber formation and<br>cell contraction<br>Leading to intimal hyperplasia                                                |
| circ-SATB2<br>[Mao YY 2018]      | Vascular<br>SMCs                                         | Human, in<br>vitro                      | PDGF-BB                                  | ↑                        | miR-939                                                | STIM1                     | Increased cell migration and<br>proliferation, decreased apoptosis                                                                        |
| Circ_0054633 [Pan<br>2018]       | Umbilical<br>vein ECs                                    | Human, in<br>vitro                      | High glucose                             | ↑                        | miR-218                                                | ROBO1, HO-1               | Promoted proliferation, migration, tube<br>formation, and inhibited apoptosis                                                             |
| CircHECW2 [Yang<br>2018]         | Brain<br>microvascul<br>ar ECs                           | Human, in<br>vitro,<br>mouse in<br>vivo | Methampheta<br>mine or LPS               | ↑                        | miR-30D                                                | ATG5                      | Promoted endothelial-mesenchymal<br>transition                                                                                            |
| hsa_circ_0068087<br>[Cheng 2019] | Umbilical<br>vein ECs                                    | Human, in<br>vitro                      | High-glucose                             | ↑                        | miR-197                                                | TLR4                      | Increased EC dysfunction, promoted<br>inflammation, including NF-κB                                                                       |
| circ_Lrp6<br>[Hall IF 2019]      | Popliteal<br>artery /<br>Mouse<br>carotid<br>artery SMCs | Human in<br>vitro, Mice<br>in vivo      | PDGF-BB                                  | ↑                        | miRNA-145                                              | -                         | circ_Lrp6 buffers miR-145 activity<br>when it is above a<br>certain level of expression leading to<br>decreased intimal hyperplasia       |
| Circ-Sirt1 [Kong<br>2019]        | Umbilical<br>vein ECs /<br>Vascular<br>SMCs              | Human/mo<br>use in vivo                 | PDGF-BB or<br>TNF-α                      | ↓                        | miR-132 /212                                           | Sirt1                     | Reduced VCAM-1, ICAM-1 and<br>MCP-1 expression, inhibited<br>inflammatory phenotypic switching of<br>VSMCs                                |

**Table S1. A summary of the mechanisms of the 140 studies investigating the role of circular RNA in the pathogenesis of atherosclerosis from the years 2016-2022 as identified in PubMed**

|                                            |                                    |                 |                                       |   |             |                                  |                                                                                                                     |
|--------------------------------------------|------------------------------------|-----------------|---------------------------------------|---|-------------|----------------------------------|---------------------------------------------------------------------------------------------------------------------|
| circ_0003575<br>[Shang L 2019]             | Aortic ECs                         | Rat in vitro    | Apoe <sup>-/-</sup> mice fed HFD      | ↑ | miR-148a-3p | FOXO4 and FOXO3 expression       | Promoted EC proliferation and migration                                                                             |
| circRNA-0044073<br>[Shen L 2019]           | Vascular SMCs, ECs                 | Human, in vitro | LPS                                   | ↑ | miR-107     | JAK/STAT signaling pathway       | Promoted migration and proliferation                                                                                |
| circ_RUSC2 [Sun J 2019]                    | Vascular SMCs                      | Human, in vitro | PDGF-BB                               | ↑ | miR-661     | SYK                              | Promoted proliferation and migration                                                                                |
| circNRG-1<br>[Sun Y 2019]                  | Aortic SMCs                        | Mice, in vitro  | Ang II                                | ↓ | miR-193b-5p | NRG-1                            | reversed the inhibitory effect of Ang II on apoptosis                                                               |
| circCHFR<br>[Yang L 2019]                  | Vascular SMCs                      | Human, in vitro | Ox-LDL                                | ↑ | miR-370     | FOXO1/Cyclin D1                  | Increased proliferation and migration                                                                               |
| hsa_circ_0002579<br>[Chen W 2020]          | Aortic SMCs                        | Human, in vitro | PDGF-BB                               | ↑ | -           | HMGA2                            | Promoted proliferation                                                                                              |
| circ_0010283<br>[Ding P 2020]              | Vascular SMCs                      | Human, in vitro | Ox-LDL                                | ↑ | miR-370-3p  | HMGB1                            | Increased viability and migration                                                                                   |
| hsa-circ_0010283<br>[Feng Z 2020]          | Vascular SMCs                      | Human, in vitro | Ox-LDL                                | ↑ | miR-133a-3p | PAPP-A                           | Increased proliferation, migration, and invasion                                                                    |
| circ_0029589<br>[Guo M 2020]               | Peripheral blood mononuclear cells | Human, in vitro | ACS                                   | ↑ | -           | IRF-1                            | Decreased macrophage pyroptosis                                                                                     |
| circ-RELL1<br>[Huang H-S 2020]             | Umbilical vein ECs                 | Human, in vitro | Ox-LDL                                | ↑ | miR-6873-3p | MyD88                            | Increased ICAM1 and VCAM1 expression, and inflammatory markers, i.e. NF-κB                                          |
| hsa_circ_0029589<br>[Huang Z 2020]         | Vascular SMCs                      | Human in vitro  | Ox-LDL                                | ↑ | miR-214-3p  | STIM1                            | Increased proliferation, migration, and invasion                                                                    |
| hsa_circ_0000345<br>[Liu H 2020]           | Aortic SMCs                        | Human in vitro  | Ox-LDL                                | ↓ | miR-640     | HIF-1α                           | Improved cell viability, reduced apoptosis, cycle arrest, cell invasion, supported HIF-1α                           |
| hsa_circ_0003204/<br>USP36<br>[Liu H 2020] | Umbilical vein ECs                 | Human, in vitro | Ox-LDL                                | ↑ | -           | E-cadherin, N-cadherin, vimentin | Reduced proliferation and migration, increased expression of E-cadherin but reduced that of N-cadherin and vimentin |
| circCDR1as<br>[Ma C 2020]                  | pulmonary artery SMCs              | Human, in vitro | Hypoxia, calcified pulmonary arteries | ↑ | miR-7-5p    | CAMK2D, CNN3                     | Increased differentiation to osteogenic phenotype promoting calcification                                           |

**Table S1. A summary of the mechanisms of the 140 studies investigating the role of circular RNA in the pathogenesis of atherosclerosis from the years 2016-2022 as identified in PubMed**

|                                |                               |                                |              |   |            |                     |                                                                                                  |
|--------------------------------|-------------------------------|--------------------------------|--------------|---|------------|---------------------|--------------------------------------------------------------------------------------------------|
| circDHCR24<br>[Peng W 2020]    | Aortic vascular SMCs          | Human, in vitro                | PDGF-BB      | ↑ | miR-149-5p | MMP9                | Facilitated proliferation, migration, and phenotypic switching                                   |
| circ_0003645<br>[Qin M 2020]   | Umbilical vein ECs            | Human, in vitro                | Ox-LDL       | ↑ | -          | NF-κB               | Increased inflammation and apoptosis, decreased cellular viability                               |
| Circ-ADAM9<br>[Tian 2020]      | Progenitor ECs, ischemic limb | Human in vitro, mice in vivo   | High-glucose | ↑ | miR-20a-5p | PTEN/ATG7           | Promoted autophagy and apoptosis                                                                 |
| circ_0124644<br>[Wang G 2020]  | Vascular ECs                  | Human, in vitro                | Ox-LDL       | ↑ | miR-149-5p | PAPP-A              | Promoted endothelial injury                                                                      |
| circ-0077930<br>[Wang S 2020]  | Umbilical vein SMCs           | Human, in vitro                | High-glucose | ↑ | miR-622    | Kras CeRNA network  | Induced senescence                                                                               |
| circVEGFC [Wei H 2020]         | Umbilical vein ECs            | Human, in vitro                | High-glucose | ↑ | miR-338-3p | HIF-1α              | Promoted proliferation and apoptosis                                                             |
| circHIPK3<br>[Wei MY 2020]     | Umbilical vein ECs            | Human, in vitro, mouse in vivo | Ox-LDL       | ↓ | miR-190b   | ATG7 signal pathway | Reduced lipid accumulation and promoted autophagy                                                |
| circRSF1 [Wei Z 2020]          | Aortic ECs                    | Human, in vitro                | Ox-LDL       | ↓ | miR-758    | CCND2               | Increased cell viability, tube formation and migration, attenuated apoptosis                     |
| circ_0029589<br>[Yu H 2020]    | Vascular SMCs                 | Human, in vitro                | Ox-LDL       | ↑ | miR-424-5p | IGF2                | Induced proliferation, migration, invasion; reduced apoptosis                                    |
| circPTPRA<br>[Zhang LL 2020]   | Vascular SMCs                 | Human, in vitro                | Ox-LDL       | ↑ | miR-636    | SP1                 | promoted proliferation and repressed apoptosis                                                   |
| circBPTF<br>[Zhang W 2020]     | Umbilical vein ECs            | Human, in vitro                | High-glucose | ↑ | miR-384    | LIN28B              | Decreased cell viability, increased apoptosis, inflammation, oxidative stress                    |
| circ_USP36<br>[Zhao Q 2020]    | Umbilical vein SMCs           | Human, in vitro                | Ox-LDL       | ↑ | miR-182-5p | KLF5                | Induced proliferation and metastasis                                                             |
| circ_CHFR<br>[Zhuang J-B 2020] | Vascular SMCs                 | Human, in vitro                | Ox-LDL       | ↑ | miR-214-3p | Wnt3                | Promoted cell growth, migration, and inflammation                                                |
| circLRP6<br>[Bai Y 2021]       | Vascular SMCs                 | Human, in vitro                | High-glucose | ↑ | miR-545-3p | HMGA1               | Promoted proliferation, migration and invasion                                                   |
| Circ-BANP<br>[Chen G 2021]     | Umbilical vein ECs            | Human, in vitro                | Ox-LDL       | ↑ | miR-370    | TXNIP               | Reduced proliferation, migration, invasion, tube formation; increased inflammation and apoptosis |

**Table S1. A summary of the mechanisms of the 140 studies investigating the role of circular RNA in the pathogenesis of atherosclerosis from the years 2016-2022 as identified in PubMed**

|                             |                              |                             |                      |   |                 |                                |                                                                                       |
|-----------------------------|------------------------------|-----------------------------|----------------------|---|-----------------|--------------------------------|---------------------------------------------------------------------------------------|
| circ_UBR4 [Ding Y 2021]     | Vascular SMCs                | Human, in vitro             | Ox-LDL               | ↑ | MiR-637         | FOXO4                          | Promoted cell cycle progression, proliferation, and migration                         |
| circ_0004872 [Fan 2021]     | Aortic vascular SMCs         | Human, in vitro             | PDGF-BB              | ↑ | MiR-513a-5p     | TXNIP                          | Induced proliferation, migration and dedifferentiation                                |
| circMAPK1 [Fu 2021]         | Vascular SMCs                | APOE-/- mice in vitro       | High-fat diet        | ↑ | miR-22-3p       | MECP2                          | Increased proliferation and migration                                                 |
| circ_0093887 [Gao 2021]     | ECs                          | Human, in vitro             | Ox-LDL               | ↓ | miR-876-3p      | CCND2 SUCNR1                   | abrogated cell injury, decreased cell proliferation and migration                     |
| circ_0090231 [Ge 2021]      | Aortic ECs                   | Human, in vitro             | Ox-LDL               | ↑ | miR-635         | NLRP3                          | improved cell viability, reduced cell injury and pyroptosis                           |
| circEys2 [Gong 2021]        | Vascular SMCs                | APOE-/- mice, in vivo       | High-fat diet        | ↑ | -               | Directly interacted with PCBP1 | enhanced cell proliferation and migration and inhibited apoptosis and differentiation |
| hsa_circ_0004543 [Han 2021] | umbilical vein ECs           | Human, in vitro             | Ox-LDL               | ↑ | -               | PI3K/AKT/NOS3                  | Reduced EC proliferation, migration, and invasion; promoted apoptosis                 |
| circSCAP [He 2021]          | Vascular SMCs                | Samples of patients with AS | Ox-LDL               | ↑ | miR-221-5       | PDE3B                          | Facilitated lipid deposition, inflammation, and oxidative stress                      |
| circDIP2C [Hu F 2021]       | Umbilical vein ECs           | Human, in vitro             | Ox-LDL               | ↓ | microRNA-556-5p | TET2                           | Promoted cell viability and angiogenesis, reduced oxidative stress and cytotoxicity   |
| circUSP36 [Huang JG 2021]   | Aortic ECs                   | Human, in vitro             | Ox-LDL               | ↑ | miR-637         | WNT4                           | suppressed proliferation and migration of ECs                                         |
| circ_0074673 [Huang Y 2021] | Umbilical vein ECs           | Human, in vitro             | Gestational Diabetes | ↑ | miR-1200        | MEOX2                          | suppressed proliferation, migration, and angiogenesis                                 |
| circMTO1 [Ji N 2021]        | Vascular SMCs                | Human, in vitro             | Ox-LDL               | ↓ | miR-182-5p      | RASA1                          | inhibited proliferation, promoted apoptosis                                           |
| circ_0004104 [Ji P 2021]    | Vascular ECs                 | Human, in vitro             | Ox-LDL               | ↑ | miR-100         | TNFAIP8                        | inhibited proliferation, promoted apoptosis and inflammation                          |
| circUSP9X [Jiang X 2021]    | Umbilical vein ECs           | Human, in vitro             | Ox-LDL               | ↑ | miR-148b-3p     | KLF5                           | Promoted LDH leakage, apoptosis, inflammation, and oxidative stress                   |
| circ-UBAP2 [Jiewei 2021]    | Retinal microvascular ECs    | Human, in vitro             | High-glucose         | ↑ | miR-589-5p      | EGR1                           | Induced oxidative stress and dysfunction                                              |
| circHIPK3 [Kang 2021]       | Aortic/umbilical artery SMCs | Human, in vitro             | -                    | ↑ | miR-637         | CDK6                           | Enhanced SMC proliferation, reduced apoptosis, promoted cell cycle progression        |

**Table S1. A summary of the mechanisms of the 140 studies investigating the role of circular RNA in the pathogenesis of atherosclerosis from the years 2016-2022 as identified in PubMed**

|                                |                                              |                              |                    |   |                      |                   |                                                                                                                                    |
|--------------------------------|----------------------------------------------|------------------------------|--------------------|---|----------------------|-------------------|------------------------------------------------------------------------------------------------------------------------------------|
| circ_0065149 [Li D 2021]       | Umbilical vein ECs                           | Human, in vitro              | Ox-LDL             | ↓ | miR-330-5p           | NF-κBp65          | Promoted cell viability, cell migration and invasion; inhibited inflammation and apoptosis                                         |
| circ_0002984 [Li R 2021]       | Vascular SMCs                                | Human, in vitro              | Ox-LDL             | ↑ | miR-326-3p           | VAMP3             | Increased VSMC viability, cell cycle distribution, and migration capacity                                                          |
| circ_0068087 [Li S 2021]       | Umbilical vein ECs                           | Human, in vitro              | Ox-LDL             | ↑ | miR-186-5p           | ROBO1             | Decreased cellular viability, increased apoptosis and inflammation                                                                 |
| circ_GRN [Li X 2021]           | Vascular SMCs                                | Human, in vitro              | Ox-LDL             | ↑ | miR-214-3p           | FOXO1             | Promoted proliferation, migration, inflammation                                                                                    |
| circSMARCA5 [Liang 2021]       | Umbilical vein ECs                           | Human, in vitro              | Ox-LDL             | ↓ | -                    | SRSF1             | reversed oxLDL-induced inhibition of EC proliferation, promoted tube formation                                                     |
| circ_ROBO2 [Lin 2021]          | Aortic SMCs                                  | Human, in vitro              | PDGF-BB            | ↑ | miR-149              | TRAF6/NF-κB       | Promoted proliferation and migration, suppressed apoptosis, increased NF-κB signaling                                              |
| circPPP1CC [Liu J 2021]        | Umbilical vein ECs                           | Human, in vitro              | Lipopolysaccharide | ↑ | miR-103a-3p, miR-107 | HMGB1, TLR9, AIM2 | Induced pyroptosis                                                                                                                 |
| circSFMBT2 [Luo Y 2021]        | Vascular SMCs                                | Human, in vitro              | PDGF-BB            | ↑ | miR-331-3p           | HDAC5             | Induced proliferation, migration                                                                                                   |
| circACTA2 [Ma 2021]            | Vascular SMCs                                | Human, in vitro              | Ang II             | ↑ | CDK4 mRNA            | CDK4, ILF3        | Induced senescence                                                                                                                 |
| circSOD2 [Mei 2021]            | Aortic vascular SMCs, carotid balloon injury | Human, in vitro, rat in vivo | PDGF-BB            | ↑ | miR-206              | NOTCH3            | Promoted SMC proliferation and neointima formation                                                                                 |
| circUSP36 [Miao 2021]          | Umbilical vein ECs                           | Human, in vitro              | Ox-LDL             | ↑ | miR-20a-5p           | ROCK2             | Induced cell cycle arrest, apoptosis, inflammatory responses, cell migration and invasion                                          |
| circ-USP9X [Peng H 2021]       | Umbilical vein ECs                           | Human, in vitro              | Ox-LDL             | ↑ | miR-599              | CLIC4             | Reduced viability, suppressed cell cycle progression and angiopoiesis, and increased apoptosis, inflammation, and oxidative stress |
| circ_USP36 [Peng K 2021]       | Umbilical vein ECs                           | Human, in vitro              | Ox-LDL             | ↑ | miR-98-5p            | VCAM1             | Accelerated apoptosis, inflammation, reduced viability                                                                             |
| hsa_circ_0003204 [Peng W 2021] | Carotid artery ECs                           | Human, in vitro              | Ox-LDL             | ↑ | miR-188-3p           | TRPC6             | Reduced viability; promoted apoptosis, inflammation and oxidative stress                                                           |

**Table S1. A summary of the mechanisms of the 140 studies investigating the role of circular RNA in the pathogenesis of atherosclerosis from the years 2016-2022 as identified in PubMed**

|                               |                                         |                 |                                  |   |             |              |                                                                                                                                               |
|-------------------------------|-----------------------------------------|-----------------|----------------------------------|---|-------------|--------------|-----------------------------------------------------------------------------------------------------------------------------------------------|
| circ_0000231 [Shao 2021]      | Umbilical vein ECs                      | Human, in vitro | Ox-LDL                           | ↑ | MiR-135a-5p | CLIC4        | Antagonized effects of astragaloside to suppress apoptosis, inflammation, and oxidative stress, recover viability                             |
| hsa_circ_0004831 [Su G 2021]  | Umbilical vein ECs                      | Human, in vitro | Ox-LDL                           | ↑ | miR-182-5p  | CXCL12       | Attenuated effects of atorvastatin to promote cell viability and cell cycle progression, inhibit apoptosis, oxidative stress and inflammation |
| circ_0003204 [Su Q 2021]      | Umbilical vein ECs                      | Human, in vitro | Ox-LDL                           | ↑ | miR-330-5p  | TLR4         | suppress viability and promote apoptosis, inflammatory response, and oxidative stress                                                         |
| circUBR4 [Sun C 2021]         | Vascular SMCs                           | Human, in vitro | Ox-LDL                           | ↑ | miR-185-5p  | FRS2         | Promoted proliferation and migration                                                                                                          |
| circ_0000345 [Tiliwaldi 2021] | Umbilical vein ECs                      | Human, in vitro | Ox-LDL                           | ↓ | miR-129-5p  | TET2         | promoted cell viability and cell cycle progression and hampered cell apoptosis                                                                |
| circ_0003204 [Wan 2021]       | Umbilical vein ECs                      | Human, in vitro | Ox-LDL                           | ↑ | miR-942-5p  | HDAC9        | Reduced cell viability, increased apoptosis, oxidative stress and inflammation                                                                |
| circHIPK3 [Wang S 2021]       | Aortic EC-secreted exosomes             | Mouse, in vitro | High-glucose                     | ↑ | miR-106a-5p | FOXO1/VCAM-1 | Promoted proliferation and inhibited apoptosis of VSMCs, promoted VCAM-1 expression and uptake of exosomes by VSMCs                           |
| circTM7SF3 [Wang X 2021]      | THP-1-derived macrophages               | Human, in vitro | Ox-LDL                           | ↑ | miR-206     | ASPH mRNA    | Suppressed viability, promoted apoptosis, inflammation and oxidative stress of THP-1-derived macrophages                                      |
| circRNA-006896 [Wen 2021]     | Umbilical vein ECs                      | Human, in vitro | unstable atherosclerotic plaques | ↑ | miR-1264    | DNMT1        | Amplified proliferation and migration of ECs in serum of patients with unstable as compared to stable plaque                                  |
| circ_CHFR [Wu 2021]           | Brain microvascular ECs                 | Human, in vitro | Ox-LDL                           | ↑ | miR-15a-5p  | EGFR         | Increased cell proliferation, cell cycle, apoptosis                                                                                           |
| circGNAQ [Wu WP 2021]         | ECs                                     | Human, in vitro | Senescence                       | ↓ | miR-146a-5p | PLK2         | Suppressed EC senescence, reduced cell proliferation and angiogenesis                                                                         |
| circNPHP4 [Xiong 2021 F]      | monocyte-derived sEVs from CAD patients | Human, in vitro | CAD                              | ↑ | miR-1231    | EGFR         | Facilitated adhesion of monocytes and coronary artery ECs, increased expression of ICAM-1 and VCAM-1                                          |

**Table S1. A summary of the mechanisms of the 140 studies investigating the role of circular RNA in the pathogenesis of atherosclerosis from the years 2016-2022 as identified in PubMed**

|                                   |                                                    |                                   |               |   |                |               |                                                                                                                                                                                 |
|-----------------------------------|----------------------------------------------------|-----------------------------------|---------------|---|----------------|---------------|---------------------------------------------------------------------------------------------------------------------------------------------------------------------------------|
| circDENND1B [Xu F 2021]           | aorta                                              | ApoE <sup>-/-</sup> mice, in vivo | High-fat diet | ↓ | miR-17-5p      | Abca1         | Promoted cholesterol efflux from macrophages alleviating foam cell formation                                                                                                    |
| circ_0003423 [Yu H 2021]          | Brain microvascular ECs                            | Human, in vitro                   | Ox-LDL        | ↓ | miR-589-5p     | TET2          | Promoted cell viability and tube formation, reduced apoptosis, oxidative injury                                                                                                 |
| hsa_circ_0030042 [Yu F 2021]      | Umbilical vein ECs                                 | Human, in vitro                   | Ox-LDL        | ↓ | Sponged eIF4A3 | FOXO1/beclin1 | inhibited ox-LDL-induced abnormal autophagy and promoted plaque stability                                                                                                       |
| circMAP3K5 [Zeng Z 2021]          | Coronary artery SMCs, wire-injury femoral arteries | Human, in vitro, mouse in vivo    | PDGF-BB       | ↓ | miR-22-3p      | TET2          | inhibited SMC proliferation, reduced neointima formation                                                                                                                        |
| hsa_circ_0003204 [Zhang B 2021]   | Primary aortic ECs                                 | Human, in vitro                   | Ox-LDL        | ↑ | miR-330-5p     | Nod2          | Facilitated oxidative stress and apoptosis                                                                                                                                      |
| circ_0004104 [Zhang C 2021]       | Umbilical vein ECs                                 | Human, in vitro                   | Ox-LDL        | ↑ | miR-328-3p     | TRIM14        | suppressed cell viability and angiogenic ability, promoted apoptosis, inflammation, and oxidative stress                                                                        |
| circ_0010283 [Zhang P 2021]       | Vascular SMCs                                      | Human, in vitro                   | Ox-LDL        | ↑ | miR-377-3p     | CCND1         | Increased proliferation, migration, and inflammation; inhibited apoptosis                                                                                                       |
| Circ_CLASP2 [Zhang Q 2021]        | Umbilical vein ECs                                 | Human, in vitro                   | High glucose  | ↓ | miR-140-5p     | FBXW7         | Promoted proliferation and inhibited apoptosis                                                                                                                                  |
| circRSF1 [Zhang Xiaohao 2021]     | Umbilical vein ECs                                 | Human, in vitro                   | Ox-LDL        | ↓ | miR-135b-5p    | HDAC1         | induced cell proliferation while inhibited apoptosis and inflammation                                                                                                           |
| hsa_circ_0024093 [Zhang Xue 2021] | Vascular SMCs                                      | Human, in vitro                   | PDGF-BB       | ↑ | miR-889-3p     | USP9X/YAP1    | Promoted cell proliferation and migration, inhibited apoptosis                                                                                                                  |
| circ_USP36 [Zhang Y 2021]         | Umbilical vein ECs                                 | Human, in vitro                   | Ox-LDL        | ↑ | miR-197-3p     | ROBO1         | Inhibited proliferation and cell cycle progression, triggered apoptosis and inflammation                                                                                        |
| circ_UBR4 [Zhang Y 2021]          | Vascular SMCs                                      | Human, in vitro                   | Ox-LDL        | ↑ | miR-107        | ROCK1         | Promoted cell cycle, increased cell viability, colony-forming ability, and migration; increased expression of proliferating cell nuclear antigen and matrix metalloproteinase 2 |
| circ_0002984 [Zheng 2021]         | Vascular SMCs                                      | Human, in vitro                   | Ox-LDL        | ↑ | miR-379-5p     | FRS2          | induced proliferation, migration, and invasion                                                                                                                                  |

**Table S1. A summary of the mechanisms of the 140 studies investigating the role of circular RNA in the pathogenesis of atherosclerosis from the years 2016-2022 as identified in PubMed**

|                                              |                    |                                          |                                     |   |             |                                        |                                                                                            |
|----------------------------------------------|--------------------|------------------------------------------|-------------------------------------|---|-------------|----------------------------------------|--------------------------------------------------------------------------------------------|
| hsa_circ_0001445 [Cai 2022]                  | Umbilical vein ECs | Human, in vitro                          | Ox-LDL                              | ↓ | miRNA-640   | TNF- $\alpha$ , IL-1 $\beta$ and IL-16 | promoted cell proliferation, inhibited ox-LDL-induced inflammation, apoptosis              |
| circ_TNPO1 [Chen M 2022]                     | Vascular SMCs      | Human, in vitro                          | Ox-LDL                              | ↑ | miR-181b    | Notch1                                 | Promoted proliferation and migration                                                       |
| circ_0000345 [Chen S 2022]                   | Arterial SMCs      | Human, in vitro                          | Ox-LDL                              | ↓ | Mir-647     | PAPD5                                  | Reduced cellular proliferation, migration and invasion, and inflammation                   |
| hsa_circ_0005699 [Chen T 2022]               | Umbilical vein ECs | Human, in vitro/<br>ApoE-/- mice in vivo | Ox-LDL                              | ↑ | miR-450b-5p | NFKB1                                  | Increased apoptosis and inflammation                                                       |
| hsa_circRNA_102541 (circ_102541) [Du N 2022] | Umbilical vein ECs | Human, in vitro                          | Athero-sclerosis                    | ↑ | miR-296-5p  | PLK1                                   | Augmented proliferation, reduced apoptosis                                                 |
| cZNF292/ cZfp292 [Heumüller 2022]            | Umbilical vein ECs | Human, in vitro/ mice in vivo            | Laminar flow / cZfp292-/- mice      | ↑ | -           | SDOS protein                           | Promoted laminar flow-induced alterations in cell orientation                              |
| hsa_circ_0008896 [Hou 2022]                  | Vascular SMCs      | Human, in vitro/ mice in vivo            | Ox-LDL / femoral artery wire injury | ↑ | hsa-miR-633 | CDC20B                                 | Increased proliferation, migration, and invasion of vascular SMCs                          |
| circ_0033596 [Jing 2022]                     | Umbilical vein ECs | Human, in vitro                          | Ox-LDL                              | ↑ | miR-217-5p  | CLIC4                                  | Inhibited viability and cell cycle progression, promoted apoptosis                         |
| circTEX14 [Kou 2022]                         | Vascular SMCs      | Human, in vitro                          | Ox-LDL                              | ↓ | miR-6509-3p | THAP1                                  | Inhibited proliferation and migration and enhanced apoptosis                               |
| circ_0090231 [Lei 2022]                      | Umbilical vein ECs | Human, in vitro                          | Ox-LDL                              | ↑ | miR-9-5p    | TXNIP                                  | Impaired angiogenesis, reduced inflammation and oxidative stress, increased apoptosis      |
| circCHMP5 [Li X 2022]                        | Umbilical vein ECs | Human, in vitro                          | Ox-LDL                              | ↑ | miR-532-5p  | ROCK2                                  | suppressed cell cycle, proliferation, and angiogenesis, induced apoptosis and inflammation |
| circCHFR [Li Y 2022]                         | Umbilical vein ECs | Human, in vitro                          | Ox-LDL                              | ↑ | miR-15b-5p  | GADD45G                                | Promoted apoptosis and proinflammatory cytokine secretion, reduced cell survival           |
| hsa_circ_0021155 [Lin J 2022]                | Aortic SMCs        | Human, in vitro                          | Ox-LDL, high-glucose                | ↑ | miR4459     | TRPM7                                  | promoted the proliferation and migration of cells                                          |



**Table S1. A summary of the mechanisms of the 140 studies investigating the role of circular RNA in the pathogenesis of atherosclerosis from the years 2016-2022 as identified in PubMed**

|                               |                                                 |                                |                        |   |             |            |                                                                                                 |
|-------------------------------|-------------------------------------------------|--------------------------------|------------------------|---|-------------|------------|-------------------------------------------------------------------------------------------------|
| circIRAK1 [Liu F 2022]        | Umbilical vein ECs                              | Human, in vitro                | Ox-LDL                 | ↑ | miR-330-5p  | TRIM14     | Reduced cell viability and angiogenesis, enhanced apoptosis, inflammation, and oxidative stress |
| circ_0026218 [Liu J]          | Umbilical vein ECs                              | Human, in vitro                | Ox-LDL                 | ↑ | miR-188-3p  | TLR4/NF-κB | Suppressed cell proliferation, increased cell apoptosis, inflammation, and oxidative stress     |
| hsa_circ_0022742 [Liu S 2022] | Umbilical vein ECs                              | Human, in vitro                | High-glucose           | ↓ | miR-503-5p  | FBXW7      | suppressed apoptosis, abnormal vascular differentiation, and secretion of inflammatory factors  |
| circCHFR [Lu X 2022]          | Aortic vascular SMCs                            | Human, in vitro                | Ox-LDL                 | ↑ | miR-214-3p  | PAPP-A     | Induced proliferation, migration, and invasion                                                  |
| circPTPRA [Luo 2022]          | Umbilical vein ECs                              | Human, in vitro                | Ox-LDL                 | ↑ | miR-671-5p  | -          | Reduced in cell viability, increase in apoptosis, and enhanced inflammation                     |
| hsa_circ_0030042 [Ma J 2022]  | Vascular SMCs                                   | Human, in vitro                | TNF-α                  | ↑ | miR-514a-3p | FOXO1      | Promoted proliferation and migration, reduced apoptosis                                         |
| circPCNX [Ma W 2022]          | Aortic vascular SMCs                            | Human, in vitro                | PDGF-BB                | ↑ | miR-1278    | DNMT1      | Induced cell proliferation, cell cycle progression, and migration                               |
| circ_0124644 [Mao 2022]       | Umbilical vein ECs                              | Human, in vitro                | Ox-LDL                 | ↑ | miR-370-3p  | FOXO4      | Inhibited cell viability, proliferation and angiogenesis, promoted apoptosis and inflammation   |
| circ_0002194 [Mei R 2022]     | Vascular ECs                                    | Human, in vitro                | Ox-LDL                 | ↑ | miR-637     | PACS2      | Reduced cell viability and angiogenesis, promoted cell apoptosis and oxidative stress           |
| ciPVT1 [Min 2022]             | Umbilical vein /coronary artery ECs, plug assay | Human, in vitro, mice in vivo  | Senescence             | ↓ | miR-24-3p   | CDK4       | Delayed senescence, promoted proliferation, and increased angiogenic activity                   |
| circUBR4 [Peng 2022]          | Vascular SMCs                                   | Human, in vitro                | Ox-LDL                 | ↑ | miR-491-5p  | NRP2       | Promoted proliferation and migration                                                            |
| circGSE1 [Qiu 2022]           | Old ECs, ischemic limbs                         | Human, in vitro / mice in vivo | Senescence             | ↓ | miR-323-5p  | NRP1       | Promoted proliferation, migration, tube formation                                               |
| circSmoc1-2 [Ryu 2022]        | Vascular SMCs                                   | Human, in vitro / mice in vivo | Vascular calcification | ↓ | miR-874-3p  | Adam19     | Reduced vascular calcification                                                                  |

**Table S1. A summary of the mechanisms of the 140 studies investigating the role of circular RNA in the pathogenesis of atherosclerosis from the years 2016-2022 as identified in PubMed**

|                                |                           |                                |         |   |             |            |                                                                                              |
|--------------------------------|---------------------------|--------------------------------|---------|---|-------------|------------|----------------------------------------------------------------------------------------------|
| circRNA-0024103 [Tian 2022]    | Umbilical vein ECs        | Human, in vitro                | Ox-LDL  | ↑ | miR-363     | MMP-10     | Promoted proliferation, migration, invasion, and tube-formation, inhibited apoptosis         |
| circ_CHFR [Wang M 2022]        | Vascular SMCs             | Human, in vitro                | PDGF-BB | ↑ | miR-149-5p  | NRP2       | Promoted cell proliferation, migration, invasion, and cell apoptosis                         |
| circ_0003423 [Wang P 2022]     | Umbilical vein ECs        | Human, in vitro                | Ox-LDL  | ↓ | miR-142-3p  | SIRT3/SOD2 | Promoted proliferation, migration, and angiogenesis, reduced oxidative stress and apoptosis  |
| circ_0002984 [Wang X 2022]     | Vascular SMCs             | Human, in vitro                | Ox-LDL  | ↑ | miR-181b-5p | VEGFA      | Induced proliferation and migration                                                          |
| circ_0093887 [Wang Y 2022]     | Aortic ECs                | Human, in vitro                | Ox-LDL  | ↓ | miR-758-3p  | BAMBI      | promoted cellular viability and tube formation, restrained cell apoptosis                    |
| circ_ARHGAP32 [Wang Y 2022]    | Vascular SMCs             | Human, in vitro                | Ox-LDL  | ↑ | miR-665     | FGF-2      | Induced proliferation and migration                                                          |
| hsa_circ_0000280 [Wang Z 2022] | Aortic SMCs               | Human in vitro, murine ex vivo | PDGF-BB | ↓ | CDKN1A mRNA | ELAVL1     | Reduced proliferation and cell cycle progression                                             |
| mmu_circ_0000271 [Yang J 2022] | Vascular SMCs             | Mouse, in vitro                | Ox-LDL  | ↑ | miR-5123    | -          | promoted viability, angiogenesis and invasion, proliferation, and migration                  |
| circLMF1 [Yang Y 2022]         | Aortic vascular SMCs      | Human, in vitro                | PDGF-BB | ↑ | miR-125a-3p | VEGFA/FGF1 | Promoted cell viability, cell cycle progression, and migration                               |
| Has_circ_0007478 [Ye B 2022]   | Macrophages               | Human, in vitro                | Ox-LDL  | ↑ | miR-765     | EFNA3      | Increased inflammation and macrophage uptake of ox-LDL                                       |
| circ_ROBO2 [Ye Q 2022]         | Cardiac microvascular ECs | Human, in vitro                | Ox-LDL  | ↑ | miR-186-5p  | TRIM14     | Suppressed cell proliferation and angiogenic ability, promoted apoptosis                     |
| circ_0030042 [Yu L 2022]       | Umbilical vein ECs        | Human, in vitro                | Ox-LDL  | ↓ | miR-616-3p  | RFX7       | Facilitated cell proliferation, repressed apoptosis, reduced inflammatory factors            |
| circ_0003204 [Zhang D 2022]    | Umbilical vein ECs        | Human, in vitro                | Ox-LDL  | ↑ | miR-491-5p  | ICAM1      | Increased inflammation and cell apoptosis, reduced cell viability and tube formation ability |
| circLIFR [Zhang H 2022]        | Umbilical artery SMCs     | Human, in vitro                | Ox-LDL  | ↓ | miR-1299    | KDR        | Enhanced vascular proliferation, migration, invasion; impeded apoptosis                      |

**Table S1. A summary of the mechanisms of the 140 studies investigating the role of circular RNA in the pathogenesis of atherosclerosis from the years 2016-2022 as identified in PubMed**

|                                |                                                   |                                |        |   |             |             |                                                                                                     |
|--------------------------------|---------------------------------------------------|--------------------------------|--------|---|-------------|-------------|-----------------------------------------------------------------------------------------------------|
| circ_0086296<br>[Zhang M 2022] | Carotid artery plaques, Umbilical vein ECs, aorta | Human, in vitro, Mouse in vivo | Ox-LDL | ↑ | miR-576-3p  | IFIT1-STAT1 | Promoted EC proliferation, migration, and inflammatory marker release                               |
| Circ_0050486<br>[Zhang P 2022] | Aortic ECs                                        | Human, in vitro                | Ox-LDL | ↑ | miR-182-5p  | MYD88       | Promoted endovascular injury                                                                        |
| CircHIPK3 [Zhang W-B 2022]     | Vascular SMCs                                     | Human, in vitro                | AS     | ↓ | miR-106a-5p | MFN2        | inhibited osteogenic/ chondrogenic differentiation, reduced cell mineralization and calcium content |
| Circ_0004104<br>[Zhang Y 2022] | Umbilical vein ECs                                | Human, in vitro                | Ox-LDL | ↑ | miR-942-5p  | ROCK2       | Reduced cell proliferation, augmented apoptosis                                                     |
| circITGB1 [Zhu J 2022]         | Dendritic cells                                   | Human, in vitro, mouse in vivo | ACS    | ↑ | miR-342-3p  | NFAM1       | Regulated dendritic cell maturation and promoted cardiac damage                                     |

SMCs: smooth muscle cells, ox-LDL: oxidized low-density lipoprotein, Bcl-2: B-cell lymphoma 2, PES1: pescadillo homologue 1, FGF-2: fibroblast growth factor 2, NRG: neuregulin-1, ICD: intracellular domain,  $\alpha$ -SMA: smooth muscle  $\alpha$ -actin, DNMT3A: DNA (cytosine-5)-methyltransferase 3A, STAT3: Signal transducer and activator of transcription 3, STIM1: stromal interaction molecule 1, LPS: lipopolysaccharide, NRP1: neuropilin-1, LPS: lipopolysaccharide, AS: atherosclerosis, Ang II: Angiotensin II, VEGFR-2: vascular endothelial growth factor receptor-2, IGFR1: insulin-like growth factor 1 receptor, HMGA2: High-mobility group AT-hook 2, HMGB1: high mobility group box 1 protein, PAPP-A: pregnancy-associated plasma protein, ACS: acute coronary syndrome, IRF-1: IFN regulatory factor-1, MyD88: myeloid differentiation primary response 88 protein, CAMK2D: calcium/calmodulin-dependent kinase II-delta, CNN3: calponin 3, MMP9: matrix metalloproteinase 9. ceRNA – competing endogenous RNA, HIF-1 $\alpha$ : hypoxia inducible factor 1 alpha, HIPK3: homeodomain interacting protein kinase 3, IGF2: insulin-like growth factor 2, LYPD3: LY6/PLAUR domain containing 3, GRIA4: glutamate ionotropic receptor, LIN28B: lin-28 homolog B, CKAP4: cytoskeleton-associated protein 4, KLF5: kruppel-like factor 5, TXNIP: thioredoxin-interacting protein, MCL1: myeloid cell leukemia sequence 1, PDGF-BB: platelet-derived growth factor-BB, CCND2: cyclin D2, SUCNR1: succinate receptor 1, NLRP3: NOD-, LRR- and pyrin domain-containing protein 3, PCBP1: polyC-binding, protein, PDE3B: phosphodiesterase 3B, DIP2C: disco interacting protein 2 homolog C, MEOX2: mesenchyme homeobox 2, RASA1: RAS P21 protein activator 1, TNFAIP8: TNF alpha induced protein 8, USP9X: ubiquitin-specific peptidase 9 X-linked, PDCD6: programmed cell death 6, EGR1: early growth response 1, VAMP3: vesicle-associated membrane protein 3, ROBO1: roundabout guidance receptor 1, SRSF1: serine/arginine-rich splicing factor 1, NF-kB – nuclear factor kappa-B, FNDC3B: fibronectin type III domain containing 3B, ADAM10: ADAM Metalloproteinase domain 10, HCAC5: histone deacetylase 5, CDK4: cyclin dependent kinase 4, ILF3: interleukin enhancer binding factor 3, THAP1: thanatos-associated domain-containing apoptosis-associated protein 1, ROCK2: Rho-associated coiled-coil kinase 2, CLIC4: chloride intracellular channel 4, VCAM1: vascular cell adhesion molecule 1, TRPC6: transient receptor potential canonical channel 6, KDR: kinase insert domain receptor, CXCL12: C-X-C motif chemokine 12, TLR4: toll-like receptor 4, FRS2: fibroblast growth factor receptor substrate 2, Grm1: glutamate metabotropic receptor 1, FUS: FUS RNA binding protein, TET2: ten-eleven translocation-2, HDAC9: histone deacetylase 9, DNMT1: DNA Methyltransferase 1, PACS2: Phosphofurin Acidic Cluster Sorting Protein 2, EGFR: epidermal growth factor receptor, PLK2: polo like kinase 2, sEVs: small extracellular vesicles, CAD: coronary artery disease, Abca1: ATP binding cassette subfamily A member 1, SOD2: superoxide dismutase-2, eIF4A3: eukaryotic initiation factor 4A-III, Nod2: nucleotide-binding oligomerization domain 2, TRIM14: t ripartite Motif Containing 14, CCND1: cyclin D1, HDAC1: histone deacetylase 1, YAP1: yes1-associated transcriptional

**Table S1. A summary of the mechanisms of the 140 studies investigating the role of circular RNA in the pathogenesis of atherosclerosis from the years 2016-2022 as identified in PubMed**

regulator, FRS2: factor receptor substrate 2, Notch1: neurogenic locus notch homolog protein, SDOS: significantly enriched protein, NFkB1: nuclear factor kappa beta subunit 1, PLK1: polo-like kinase 1, CDC20B: cell division cycle 20B, GADD45G: growth arrest and DNA damage inducible gamma, FBXW7: F-box and WD repeat domain containing 7, RFX1: regulatory factor X 1, NRP2: Neuropilin-2, VEGFA: Vascular endothelial growth factor A, SIRT3: Sirtuin 3, BAMBI: BMP And Activin Membrane-Bound Inhibitor, ICAM1: intracellular adhesion molecule 1, KDR: kinase insert domain receptor, IFIT1-STAT1: interferon induced protein with tetratricopeptide repeats 1- signal transducer and activator of transcription 1, NFAM1: NFAT activating molecule 1
